# Supplementary material
Source: MDPI journal article supplement (https://www.mdpi.com/2073-4344/12/12/1668)
Supplement: s1 [file s1]

# Supporting Information

## Heterojunction Design between WSe<sub>2</sub> Nanosheets and TiO<sub>2</sub> for Efficient Photocatalytic Hydrogen Generation

Xu Guo <sup>1,\*</sup>, Xing Liu <sup>1</sup>, Jing Shan <sup>1</sup>, Guangtao Zhao <sup>1</sup> and Shengzhong (Frank) Liu <sup>1,2,3,\*</sup>

<sup>1</sup> Shaanxi Key Laboratory for Advanced Energy Devices, Shaanxi Engineering Lab for Advanced Energy Technology, School of Materials Science and Engineering, Shaanxi Normal University, Xi'an 710119, China

<sup>2</sup> Center of Materials Science and Optoelectronics Engineering, University of Chinese Academy of Sciences, Beijing 100049, China

<sup>3</sup> Dalian Institute of Chemical Physics, Chinese Academy of Sciences, Dalian 116023, China

\* Correspondence: guoxu@snnu.edu.cn (X.G.); szliu@dicp.ac.cn (S.L.)

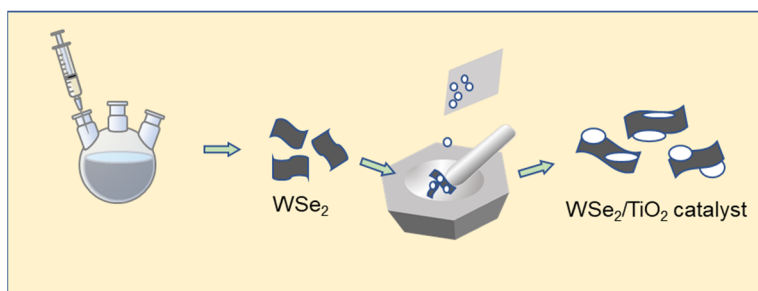

Figure S1. Scheme illustration of synthesis procedure of TW-x catalysts

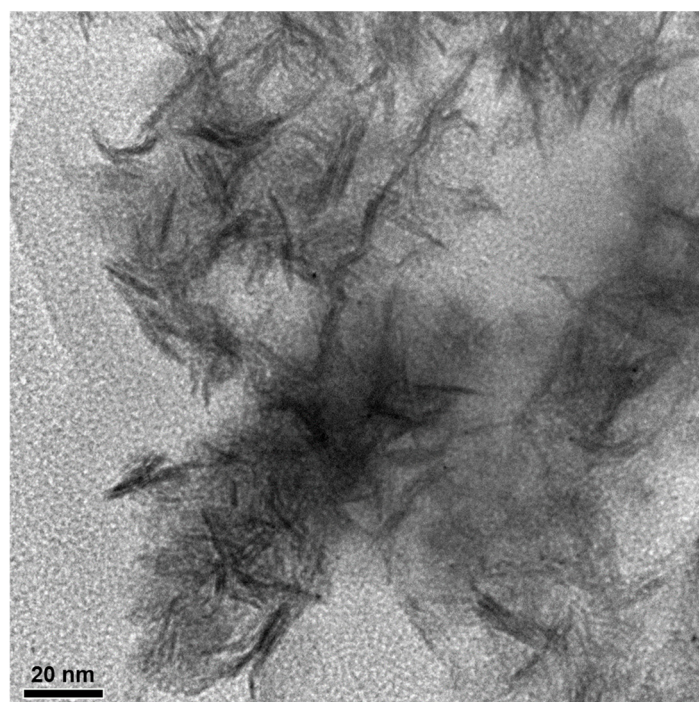

Figure S2. TEM image of WSe<sub>2</sub> nanosheets with low-magnification. The nanosheet was about ~20 nm.

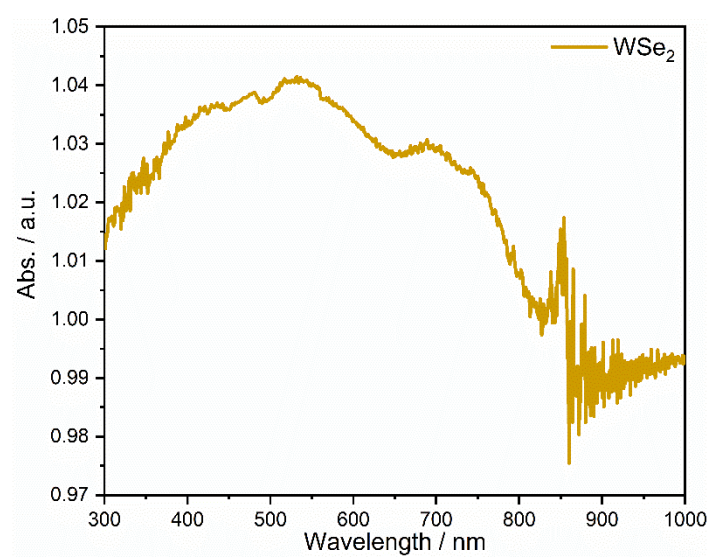

Figure S3. UV-Vis absorption spectra of WSe<sub>2</sub> nanosheets from 300 nm to 1000 nm.

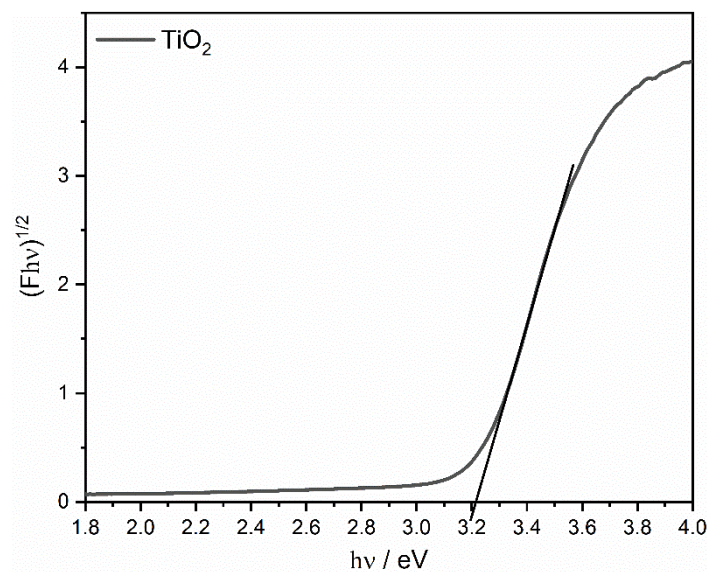

Figure S4. Band-gap evaluation of TiO<sub>2</sub> from Tauc plot.

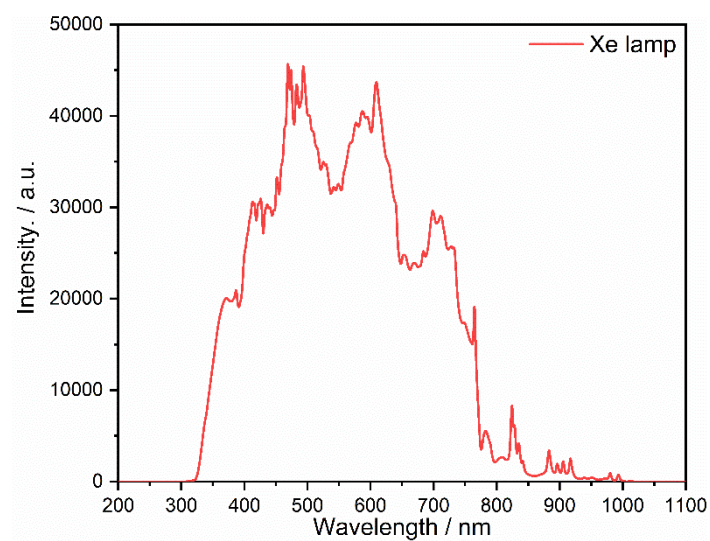

Figure S5. The spectrum of Xe lamp used for light irradiation.

Table S1. Fitting data for photoluminescence emission decay curves using a biexponential function.

| Studied Samples  | $a_1$ | $t_1$ (ns) | $a_2$ | $t_2$ (ns) | Average lifetime |
|------------------|-------|------------|-------|------------|------------------|
| TiO <sub>2</sub> | 0.82  | 0.28       | 0.21  | 2.10       | 1.48             |
| TW-2             | 1.00  | 0.21       | 0.22  | 1.83       | 1.27             |

Table S2. Binding energies of studied samples

| Binding Energy / eV | TiO <sub>2</sub> | TW-2   | WSe <sub>2</sub> |
|---------------------|------------------|--------|------------------|
| Ti                  | 458.34           | 458.36 | /                |
| Ti                  | 464.03           | 464.04 | /                |
| O                   | 529.56           | 529.58 | /                |
| O                   | 531.41           | 531.46 | /                |
| W                   | /                | 30.65  | 31.52            |
| W                   | /                | 32.87  | 33.63            |
| W                   | /                | 34.66  | 35.32            |
| W                   | /                | 36.59  | 37.50            |
| Se                  | /                | 53.38  | 54.10            |

Table S3. Comparison of hydrogen evolution for cocatalysts-TiO<sub>2</sub> photocatalysts.

| Photocatalyst                                                       | Light source | Sacrificial reagent | Activity<br>(mmol/ g·h) | AQY<br>(365 nm) |
|---------------------------------------------------------------------|--------------|---------------------|-------------------------|-----------------|
| PtAu/TiO <sub>2</sub>                                               | Xe lamp      | Methanol            | 61.5                    | 72.9%[1]        |
| Pt/TiO <sub>2</sub>                                                 | Xe lamp      | Methanol            | 29.63                   | 45.6%[2]        |
| Pd/TiO <sub>2</sub>                                                 | 365 LED      | Ethanol             | 86.7                    | 14.9%[3]        |
| NiCuS <sub>x</sub> /TiO <sub>2</sub>                                | 365 nm LED   | Methanol            | 8.56                    | 34.67%[4]       |
| Cu <sub>2</sub> (OH) <sub>2</sub> CO <sub>3</sub> /TiO <sub>2</sub> | Xe lamp      | Ethylene glycol     | 0.50                    | 31.9%[5]        |
| Cu-NW/TiO <sub>2</sub>                                              | 365 nm LED   | Methanol            | 5.104                   | 17.2%[6]        |
| MoS <sub>2</sub> /TiO <sub>2</sub>                                  | Xe lamp      | Methanol            | 1.84                    | 13.6%[7]        |
| Ni-NiS <sub>x</sub> /TiO <sub>2</sub>                               | 365 nm LED   | Ethanol             | 4.47                    | 12.78%[8]       |
| MoS <sub>2</sub> /GO/TiO <sub>2</sub>                               | Xe lamp      | Ethanol             | 2.07                    | 9.7%[9]         |
| WSe <sub>2</sub> /TiO <sub>2</sub>                                  | Xe lamp      | Methanol            | 2.28                    | 43.8%           |

1. Wei, T.; Ding, P.; Wang, T.; Liu, L.-M.; An, X.; Yu, X., Facet-regulating local coordination of dual-atom cocatalyzed TiO<sub>2</sub> for photocatalytic water splitting. *ACS Catal.* **2021**, *11*, 14669-14676.
2. Ruan, X.; Cui, X.; Cui, Y.; Fan, X.; Li, Z.; Xie, T.; Ba, K.; Jia, G.; Zhang, H.; Zhang, L.; Zhang, W.; Zhao, X.; Leng, J.; Jin, S.; Singh, D.; Zheng, W.; Favorable energy band alignment of TiO<sub>2</sub> anatase/rutile heterophase homojunctions yields photocatalytic hydrogen evolution with quantum efficiency exceeding 45.6%. *Adv. Energy Mater.* **2022**, *12*, 2200298.
3. Chen, Y.; Soler, L.; Armengol-Profits, M.; Xie, C.; Crespo, D.; Llorca, J., Enhanced photoproduction of hydrogen on Pd/TiO<sub>2</sub> prepared by mechanochemistry. *Appl. Catal. B-Environ.* **2022**, *309*, 121275.
4. Zhong, W.; Gao, D.; Yu, H.; Fan, J.; Yu, J., Novel amorphous nicos H<sub>2</sub>-evolution cocatalyst: optimizing surface hydrogen desorption for efficient photocatalytic activity. *Chem. Eng. J.* **2021**, *419*, 129652.
5. Xu, L.; Li, L.; Ao, Y.; Long, F.; Guan, J., Engineering highly efficient photocatalysts for hydrogen production by simply regulating the solubility of insoluble compound cocatalysts. *Int. J. Hydrogen Energy* **2014**, *39*, 11486-11493.
6. Xiao, S.; Liu, P.; Zhu, W.; Li, G.; Zhang, D.; Li, H., Copper nanowires: a substitute for noble metals to enhance photocatalytic H<sub>2</sub> generation. *Nano Lett* **2015**, *15*, 4853-8.
7. Du, F.; Lu, H.; Lu, S.; Wang, J.; Xiao, Y.; Xue, W.; Cao, S., Photodeposition of amorphous MoS<sub>x</sub> cocatalyst on TiO<sub>2</sub> nanosheets with {001} facets exposed for highly efficient photocatalytic hydrogen evolution. *Int. J. Hydrogen Energy* **2018**, *43*, 3223-3234.
8. Wang, P.; Xu, S.; Chen, F.; Yu, H., Ni nanoparticles as electron-transfer mediators and NiS<sub>x</sub> as interfacial active sites for coordinative enhancement of H<sub>2</sub>-evolution performance of TiO<sub>2</sub>. *Chinese J. Catal.* **2019**, *40*, 343-351.
9. Xiang, Q.; Yu, J.; Jaroniec, M., Synergetic effect of MoS<sub>2</sub> and graphene as cocatalysts for enhanced photocatalytic H<sub>2</sub> production activity of TiO<sub>2</sub> nanoparticles. *J. Am. Chem. Soc.* **2012**, *134*, 6575-8.
